# Supplementary material for: Graphene/cellulose nanocrystals hybrid aerogel with tunable mechanical strength and hydrophilicity fabricated by ambient pressure drying technique
Source: Royal Society of Chemistry journal article supplement (doi:10.1039/c6ra28178h), 2017-01-01
Supplement: c6ra28178h1.pdf [file c6ra28178h1.pdf]

## Supplementary

Graphene/cellulose nanocrystals hybrid aerogel with tunable mechanical strength and hydrophilicity fabricated by ambient pressure drying technique

Xiaofang Zhang, Ping Liu, Yongxin Duan, Min Jiang\* and Jianming Zhang\*

Key Laboratory of Rubber-Plastics, Ministry of Education/Shandong Provincial Key Laboratory of Rubber-Plastics, Qingdao University of Science & Technology, Qingdao 266042, China.

---

\*Corresponding author. Tel.: +86 532 84022420 Fax: +86 532 84022791.

E-mail:jiangmin@qust.edu.cn (M. Jiang) E-mail: zjm@qust.edu.cn (J. M. Zhang)

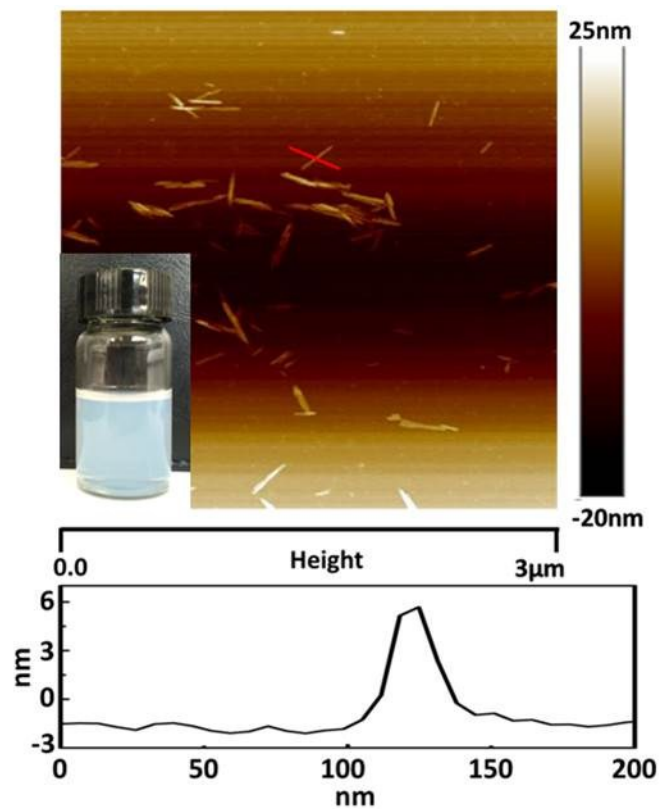

**Fig. S1-** AFM image of the prepared CNC nano-rods spinning coated on mica plate and the height profiles of the selected CNC rod. Inset is the picture of well dispersed CNC suspension.

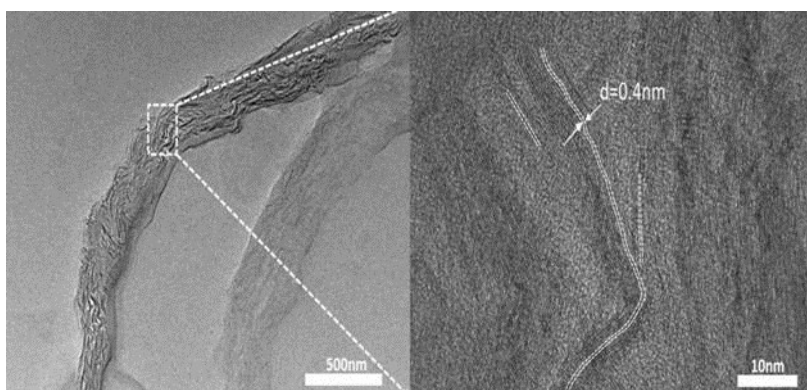

**Fig. S2-** TEM images of a cellular wall of the GCHA-50 (left) and its enlargement (right).

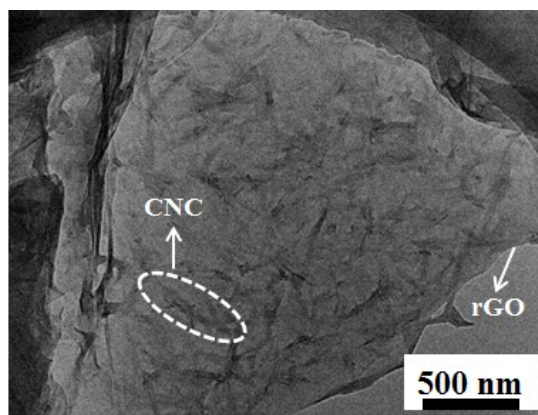

**Fig. S3** TEM image of GCHA-20.

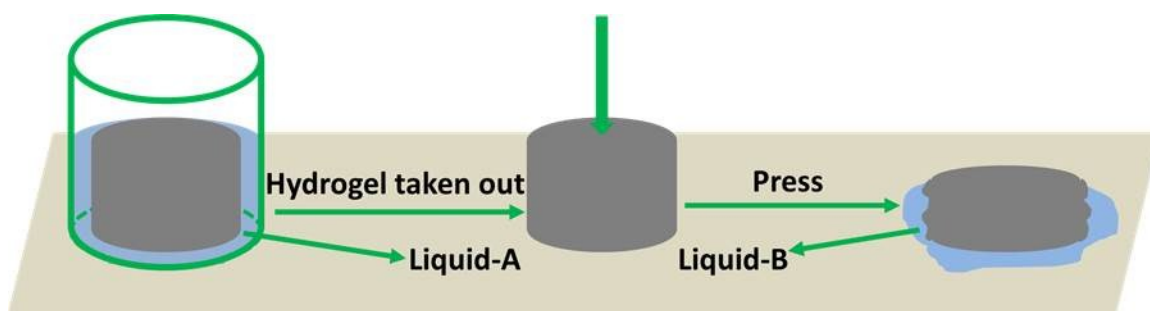

**Fig. S4-** Schematic diagram for illustrating the acquisition of Liquid-A and Liquid-B from inside and outside of GCHA gel.

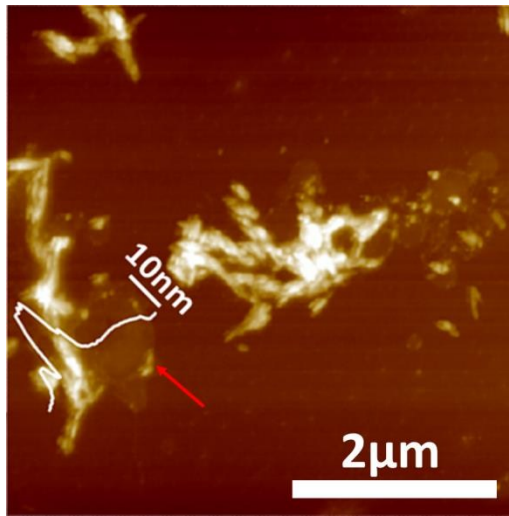

**Fig. S5-** AFM topographic images of Liquid-B ( obtained from PrGO hydrogel containing 20 wt% CNC) on mica.

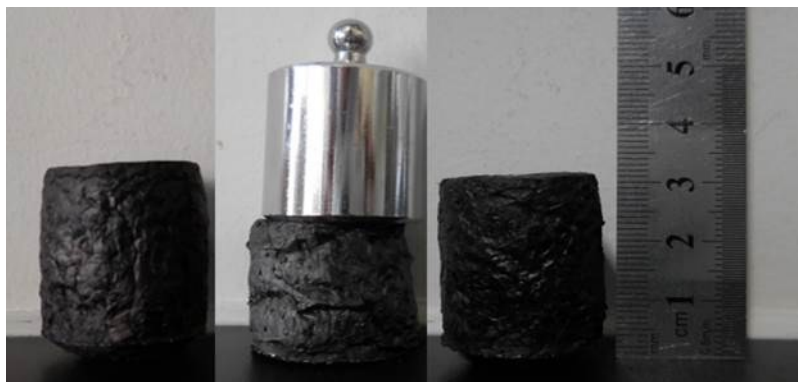

**Fig. S6-** Compression and recovery picture of GCHA-20. The weight is 200g.

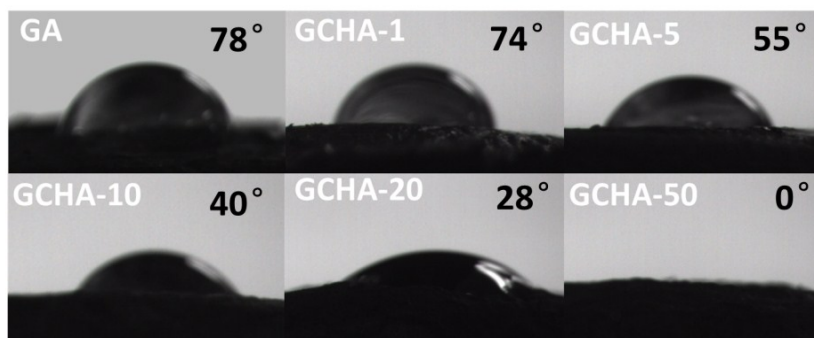

**Fig. S7-** Water contact angle measurements of GA and GCHAs.
